# Supplementary material for: Presence of electrolyte promotes wetting and hydrophobic gating in nanopores with residual surface charges
Source: Royal Society of Chemistry journal article supplement (doi:10.1039/c4an02244k), 2015-01-01
Supplement: c4an02244k1.pdf [file c4an02244k1.pdf]

## Supporting Information

### Presence of Electrolyte Promotes Wetting and Hydrophobic Gating in Nanopores with Residual Surface Charges

Laura Innes<sup>1</sup>, Diego Gutierrez<sup>1,2</sup>, William Mann<sup>1,2</sup>, Steven Buchsbaum<sup>1</sup>,  
Zuzanna S. Siwy<sup>1,3,4</sup>

<sup>1</sup>Department of Physics and Astronomy, University of California, Irvine, CA 92697

<sup>2</sup>Department of Physics, California State University, Long Beach, CA

<sup>3</sup>Department of Chemistry; <sup>4</sup>Department of Biomedical Engineering, University of  
California, Irvine, CA 92697

#### 1. A single nanopore modified with propylamine.

10 mM KCl

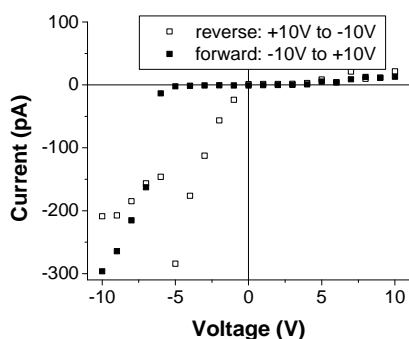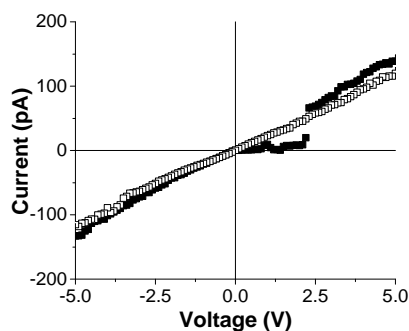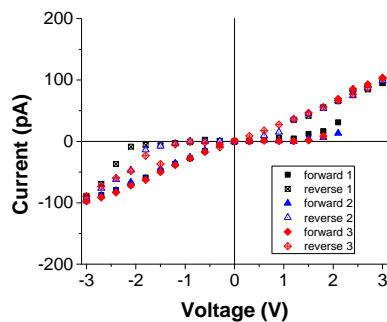

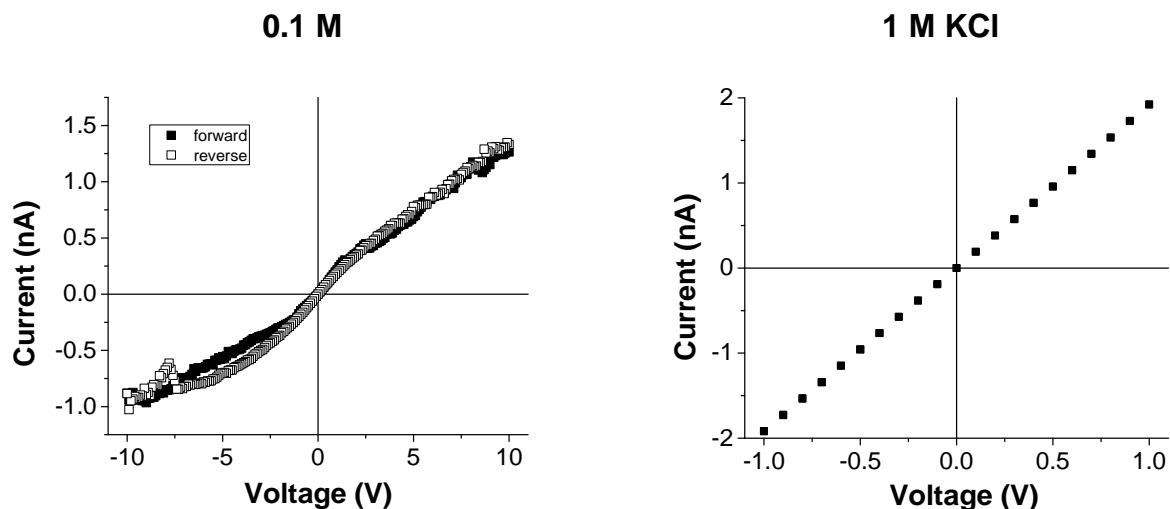

**Figure S1.** Current-voltage curves through a single 5 nm in diameter conically shaped nanopore modified with propylamine. This is a different pore than the structure shown in Figure 1c in the main manuscript. Recordings were performed in 10 mM, 0.1 M and 1 M KCl. Filled and empty squares indicate forward and reverse bias, respectively.

## 2. A single nanopore modified with hexylamine.

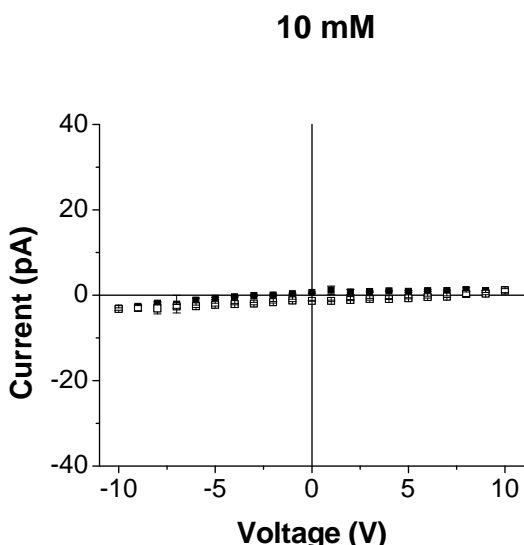

100 mM

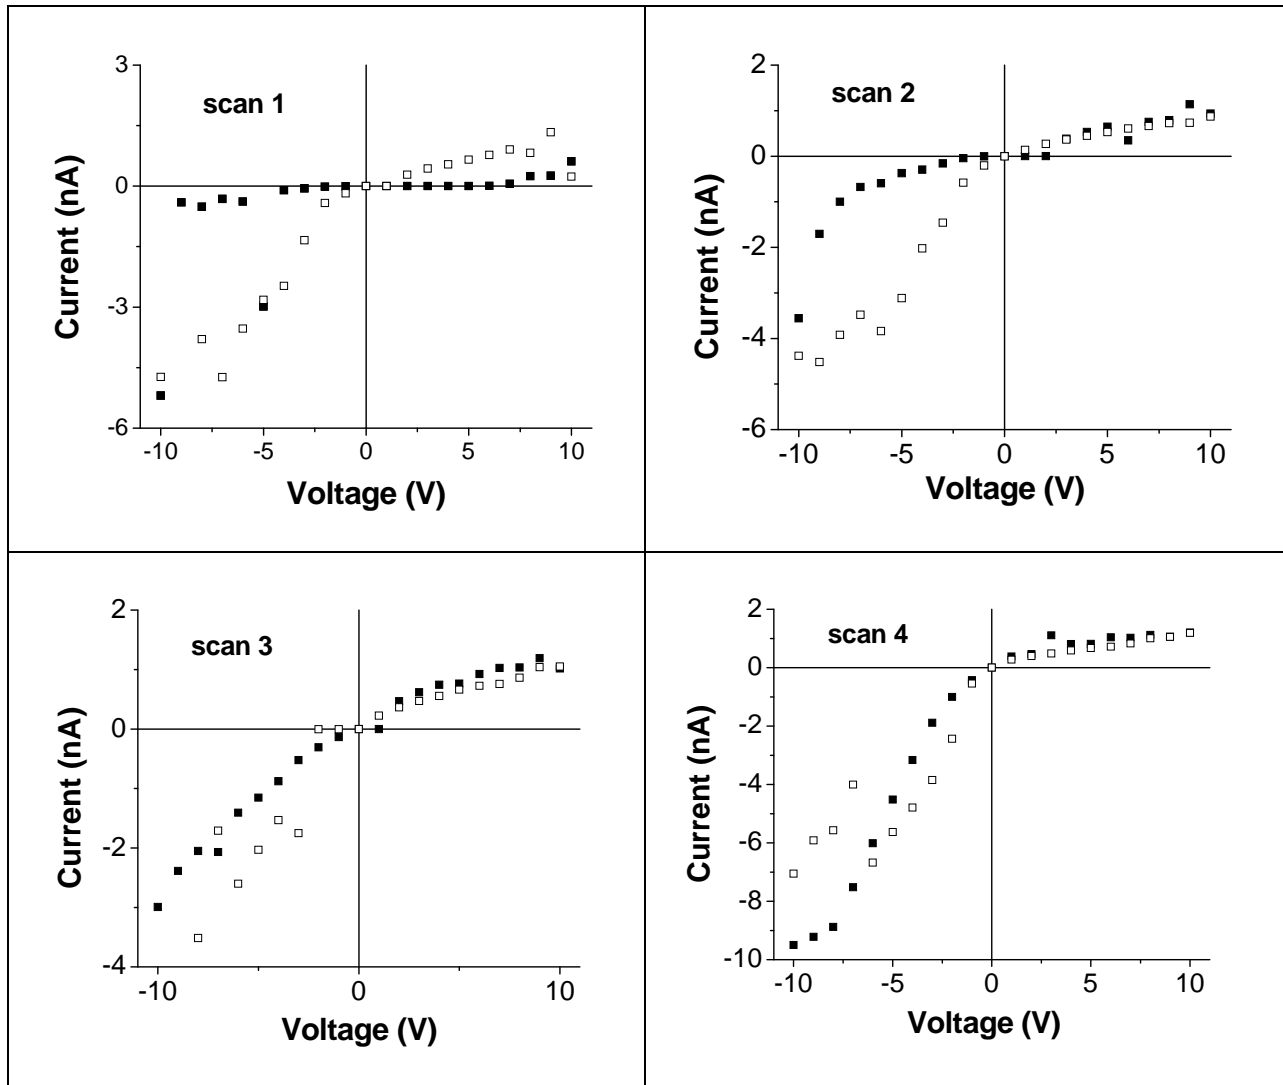

**Figure S2.** Current-voltage curves through a single 11 nm in diameter conically shaped nanopore modified with hexylamine recorded in 10 mM and 0.1 M KCl. Filled and empty squares indicate forward and reverse bias, respectively. Four individual scans are shown for 0.1 M KCl; the pore conducted current for all voltages in the fourth scan.
